# Supplementary material for: Esophageal Cancer-Derived Extracellular Vesicle miR-21-5p Contributes to EMT of ESCC Cells by Disorganizing Macrophage Polarization
Source: MDPI journal article supplement (doi:10.3390/cancers13164122), 2021-08-16
Supplement: s1 [file s1]

## Article

# Esophageal Cancer-Derived Extracellular Vesicle miR-21-5p Contributes to EMT of ESCC Cells by Disorganizing Macrophage Polarization

Jing Song, Peiyan Yang, Xiuwen Li, Xinyi Zhu, Mengxin Liu, Xuexin Duan and Ran Liu

**Table S1.** Basic characteristics of patients.

| Characteristics       | ESCC, N (%)  | Healthy Control, N (%) | P-Value |
|-----------------------|--------------|------------------------|---------|
| Total                 | 36 (100)     | 36 (100)               |         |
| Age, Year             | 60.14 ± 7.19 | 59.72 ± 5.36           | 0.781   |
| Gender (male/female)  | 15/21        | 12/24                  | 0.465   |
| TNM staging           |              |                        |         |
| T1                    | 9 (25.0)     |                        |         |
| T2                    | 13 (36.1)    |                        |         |
| T3                    | 14 (38.9)    |                        |         |
| T4                    | 0 (0.0)      |                        |         |
| Lymph node metastasis |              |                        |         |
| Positive              | 7 (19.4)     |                        |         |
| Negative              | 29 (80.6)    |                        |         |

**Table S2.** The sequences of primer pairs.

| Gene        | Forward Primer (5′–3′)  | Reverse Primer (5′–3′)     |
|-------------|-------------------------|----------------------------|
| CD68        | CTTCTCTCATTCCCCTATGGACA | GAAGGACACATTGTACTCCACC     |
| IL-6        | CACTGGTCTTTTGGAGTTTGAG  | GGACTTTTGTACTCATCTGCAC     |
| TNF-α       | CGTGGAGCTGGCCGAGGAG     | AGGAAGGAGAAGAGGCTGAGGAAC   |
| IL-1β       | ATGATGGCTTATTACAGTGGCAA | GTCGGAGATTTCGTAGCTGGA      |
| IL-12       | TGCCCATTGAGGTCATGGTG    | CTTGGGTGGGTCAGGTTTGA       |
| SOCS3       | GAGGCTGGAGGTCATTGGAGAGG | AGGTAATTCCATCGCTGCTACATTCC |
| NF-κB p65   | CCCACGAGCTTGTAAGGAAAGG  | CCTGGTCCTGTGTAGCCATT       |
| CCR7        | TGAGGTCACGGACGATTACAT   | GTAGGCCCCACGAAACAAATGAT    |
| IDO1        | GCCAGCTTCGAGAAAGAGTTG   | ATCCCAGAACTAGACGTGCAA      |
| IL-10       | CCTGGAGGAGGTGATGCCCCA   | CCTGCTCCACGGCCTTGCTC       |
| TGF-β1      | CTCTGCCTCCTCCTGCCTGTC   | AGAGTGTGCTATGGTGAATGAG     |
| CD206       | CTACAAGGGATCGGGTTTATGGA | TTGGCATTGCCTAGTAGCGTA      |
| CD209       | AATGGCTGGAACGACGACAAA   | CAGGAGGCTGCGGACTTTTT       |
| CD163       | TGTGGCCTGCATAGAGAGTG    | TTCCCCAAAATGAGCAGAAC       |
| CCL13       | CTCAACGTCCCATCTACTTGC   | TCTTCAGGGTGTGAGCTTTCC      |
| β-actin     | CCACTGGCATCGTGATGGA     | CGCTCGGTGAGGATCTTCAT       |
| U6          | CTCGCTTCGGCAGCACA       | AAACGCTTCACGAATTTGCGT      |
| miR-21-5p   | GCGCGTAGCTTATCAGACTGA   | AGTGCAGGGTCCGAGGTATT       |
| miR-193b    | GCGAACTGGCCCTCAAAGT     | AGTGCAGGGTCCGAGGTATT       |
| let-7c-5p   | CGCGCGTGAGGTAGTAGTTTGT  | AGTGCAGGGTCCGAGGTATT       |
| miR-181a-5p | CGAACATTCAACGCTGTGCG    | AGTGCAGGGTCCGAGGTATT       |
| let-7i-5p   | CGCGCGTGAGGTAGTAGTTTGT  | AGTGCAGGGTCCGAGGTATT       |
| miR-223-3p  | GCGCGTGTCAAGTTGTCAAAT   | AGTGCAGGGTCCGAGGTATT       |
| miR-146a    | CGCGTGAGAACTGAATTCCA    | AGTGCAGGGTCCGAGGTATT       |
| miR-124     | CGTAAGGCACGCGGTGAA      | AGTGCAGGGTCCGAGGTATT       |
